# Supplementary material
Source: PubMed Central journal article supplement (PMC7157959)
Supplement: UOEH_A_1628350_SM6897.pdf [file UOEH_A_1628350_SM6897.pdf]

***SUPPLEMENTAL FILE for:***

Personal protective equipment doffing practices of healthcare workers

Linh T. Phan, Dayana Maita, Donna C. Mortiz, Rachel Weber, Charissa Fritzen-Pedicini, Susan C. Bleasdale, and Rachael M. Jones

To follow is the PPE Observation Checklist used in this study.

**PPE Observation Checklist**

| <b>PPE Doffing Observation</b>                                 |               |             |                      | <b>Observation Form</b>           |                  |                  |                  |
|----------------------------------------------------------------|---------------|-------------|----------------------|-----------------------------------|------------------|------------------|------------------|
| <b>Experiment Code:</b>                                        |               |             | <b>HCW code:</b>     |                                   |                  | <b>Date:</b>     |                  |
| <b>Observation Code:</b>                                       |               |             | <b>HCW type:</b>     |                                   |                  |                  |                  |
| <b>PPE</b>                                                     | <b>Gloves</b> | <b>Gown</b> | <b>Surgical Mask</b> | <b>Surgical Mask w/ Eyeshield</b> | <b>Other PPE</b> | <b>Other PPE</b> | <b>Other PPE</b> |
| Doffing order                                                  |               |             |                      |                                   |                  |                  |                  |
| <b>WITH</b> Flourish and/or<br><b>NOT</b> Gently/<br>Carefully |               |             |                      |                                   |                  |                  |                  |
| <b>NOT</b> Inside-out or<br>glove-in-glove                     |               |             |                      |                                   |                  |                  |                  |
| Removed from the<br>front                                      |               |             |                      |                                   |                  |                  |                  |
| Dispose/wore PPE<br>outside patient room<br>(other than mask)  |               |             |                      |                                   |                  |                  |                  |
| Other inappropriate<br>doffing comments                        |               |             |                      |                                   |                  |                  |                  |
| <b>Observed</b>                                                |               |             |                      |                                   |                  |                  |                  |

| <b>Other</b>                                                                                                         | <b>Check if yes</b>              | <b>Note</b> |
|----------------------------------------------------------------------------------------------------------------------|----------------------------------|-------------|
| Uncovered contact with other potentially<br>contaminated PPE/surfaces                                                |                                  |             |
| Hand hygiene after doffing (circle one)<br>(SW= soap and water, ABHR = alcohol based<br>hand rub, N/O= not observed) | <b>S/W ABHR None N/O</b>         |             |
| Mask disposal location                                                                                               | <b>Inside room/ Outside room</b> |             |

| <b>PPE checklist</b>         | <b>Check if Yes</b> |
|------------------------------|---------------------|
| Gloves                       |                     |
| Gown                         |                     |
| Surgical Mask                |                     |
| Surgical Mask with Eyeshield |                     |
| N95 respirator               |                     |
| Goggles                      |                     |
| Other                        |                     |
